# Supplementary material
Source: Springer Nature journal article supplement (https://www.springermedizin.de/resource/supplementary/12889_2013_6870_MOESM2_ESM.pdf/9499180)

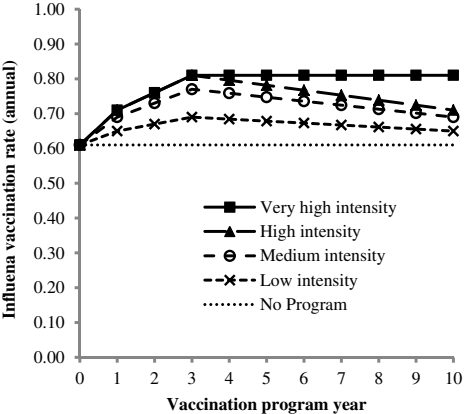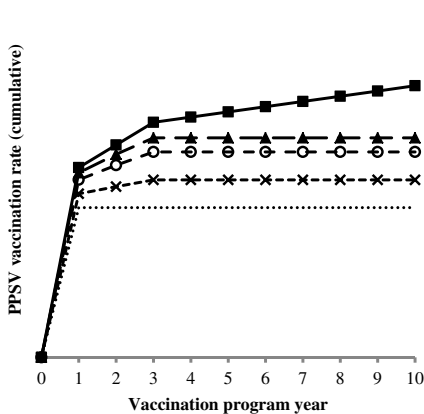

Supplement: MOESM2 [file 9499180]
